# Supplementary material for: Modular bioreactor for primary human hepatocyte culture: Medium flow stimulates expression and activity of detoxification genes
Source: PubMed Central journal article supplement (PMC3123466; doi:10.1002/biot.201000326), 2011-05
Supplement: biot0006-0554-SD2.pdf [file biot0006-0554-SD2.pdf]

**Table SI.2. Effect of medium flow on hepatocyte gene expression**

| Gene              | Dynamic <sup>a</sup> |       | Static <sup>a</sup> |       | Sandwich <sup>a</sup> |       | Collagen <sup>a</sup> |       | FIH        |       |
|-------------------|----------------------|-------|---------------------|-------|-----------------------|-------|-----------------------|-------|------------|-------|
|                   | Percentage           | SEM   | Percentage          | SEM   | Percentage            | SEM   | Percentage            | SEM   | Percentage | SEM   |
| <b>Albumin</b>    | 7.89                 | 4.29  | 10.16               | 5.61  | 27.57*                | 5.71  | 12.19                 | 3.96  | 100*       | 75.53 |
| <b>AAT</b>        | 50.22                | 47.04 | 39.19               | 37.98 | 81.70                 | 42.76 | 49.25                 | 35.24 | 100        | 54.76 |
| <b>Factor V</b>   | 15.43                | 4.54  | 12.74               | 4.78  | 53.99                 | 29.55 | 15.45                 | 4.61  | 100        | 52.25 |
| <b>Factor VII</b> | 7.03                 | 4.48  | 5.78                | 4.53  | 14.02                 | 5.95  | 5.90                  | 3.53  | 100        | 41.70 |
| <b>CPS1</b>       | 15.31                | 14.98 | 54.26               | 43.14 | 53.60                 | 36.73 | 20.30                 | 8.67  | 100        | 70.59 |
| <b>G6P</b>        | 5.22                 | 6.07  | 8.72                | 9.75  | 9.45                  | 4.29  | 2.64                  | 3.30  | 100*       | 53.00 |
| <b>PEPCK 1</b>    | 7.03                 | 8.14  | 1.26                | 1.09  | 2.94                  | 2.33  | 1.26                  | 0.72  | 100        | 27.50 |
| <b>GK</b>         | 2.79                 | 0.73  | 3.89                | 2.06  | 13.27*                | 4.05  | 13.80                 | 15.94 | 100        | 63.82 |
| <b>PK-L</b>       | 2.66                 | 2.08  | 6.86                | 6.43  | 13.74                 | 16.45 | 5.61                  | 3.78  | 100        | 49.75 |
| <b>ApoF</b>       | 0.77                 | 0.71  | 2.49                | 2.30  | 4.84                  | 2.42  | 2.14                  | 1.85  | 100        | 61.70 |
| <b>ApoH</b>       | 2.56                 | 1.62  | 4.48                | 3.12  | 7.83                  | 4.99  | 5.70                  | 3.02  | 100*       | 42.05 |
| <b>HNF4a</b>      | 82.51                | 23.73 | 70.16               | 20.95 | 97.03                 | 42.76 | 78.14                 | 28.45 | 100        | 61.81 |
| <b>C/EBPa</b>     | 29.19                | 9.39  | 20.97               | 10.45 | 81.83                 | 25.25 | 33.15                 | 19.65 | 100        | 55.15 |

NQ: Not Quantifiable

NC: Not Calculable

\*p<0.05 with respect to gene expression in dynamic conditions (n=6)

a. Dynamic and Static: see Fig 2. Sandwich and Collagen: standard conditions in collagen sandwich configuration or on collagen (0.8 x10<sup>6</sup> cells per ml). See Experimental for detail.
